# Supplementary material
Source: publisher figshare collection journal article supplement (https://gsajournals.figshare.com/articles/dataset/_/12293138)
Supplement: Supplementary file 1 [file 1]

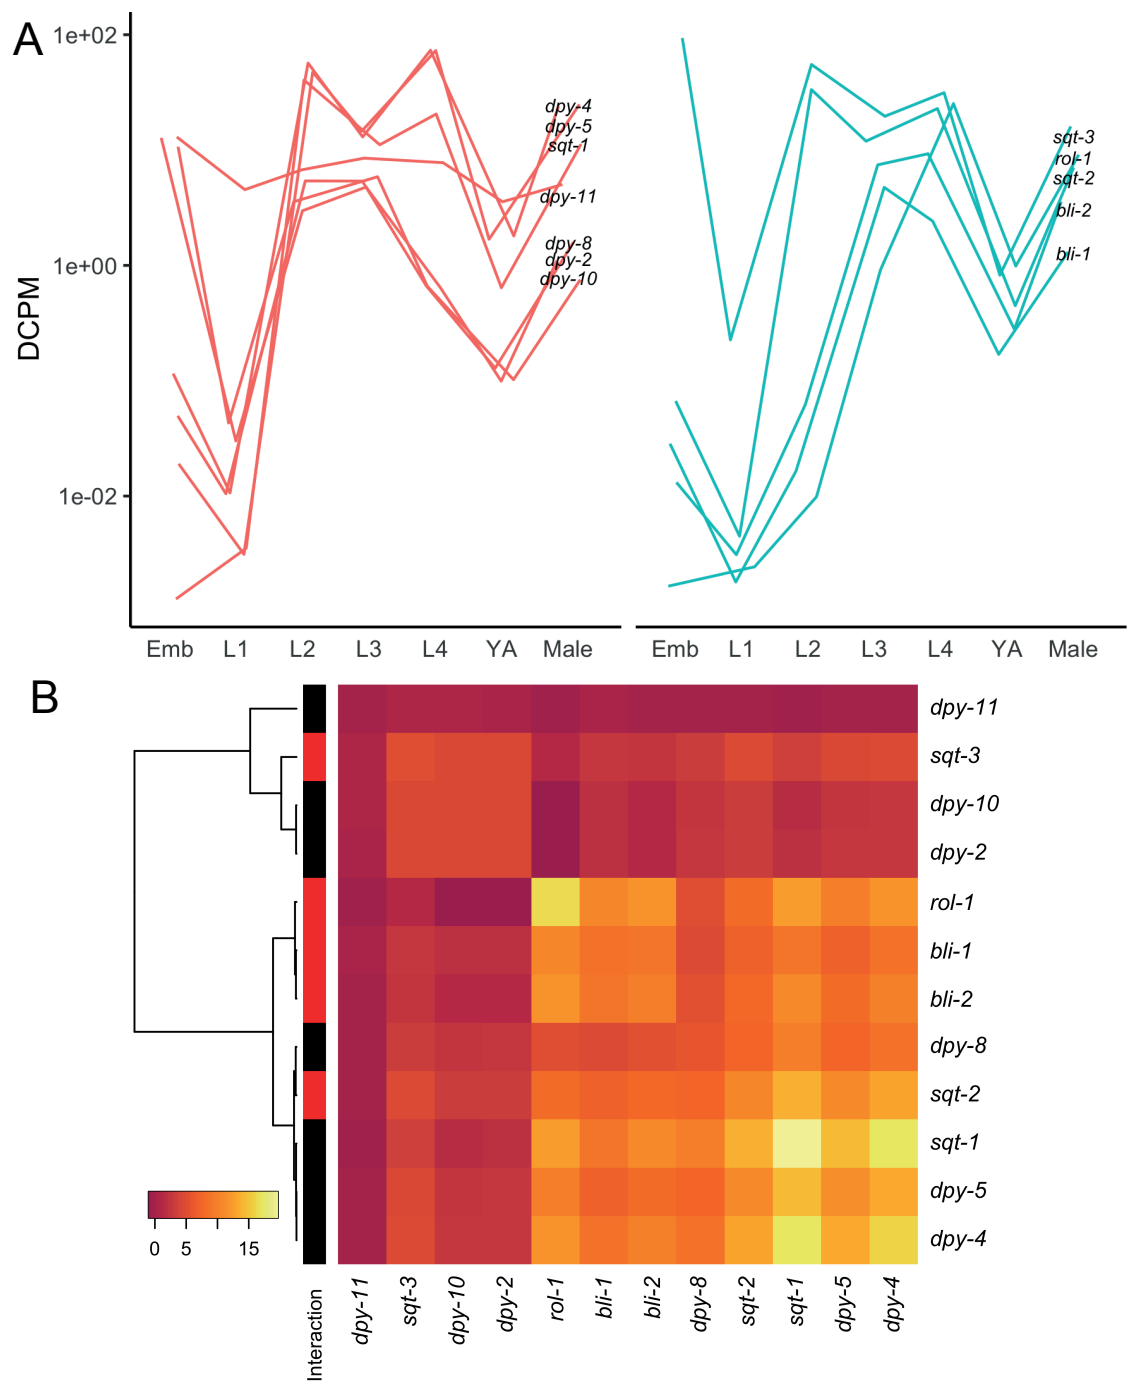

**Figure S1** Developmental expression of cuticle genes, mutant alleles of which were tested for genetic interactions with *col-182*. Expression trajectories (A), split by the presence of any detected genetic interaction (*col-182* interactors at right, with a small positional jitter added along the x-axis as a visual aid), and expression covariance (B) across embryonic and larval stages and young adult (YA) hermaphrodites and males. Mean values of replicate experiments per stage are shown from Boeck *et al.* (2016).

| Probe        | ID        | Gene            | Pos.       | Chr. | QTL    | LOD  |
|--------------|-----------|-----------------|------------|------|--------|------|
| A_12_P107311 | R05F9.5   | <i>gst-9</i>    | 4,893,372  | 2    | 134.26 | 8.78 |
| A_12_P120030 | B0464.1   | <i>dars-1</i>   | 9,489,112  | 3    | 133.00 | 4.83 |
| A_12_P116084 | Y40B10A.2 | <i>comt-3</i>   | 2,061,050  | 5    | 133.00 | 8.62 |
| A_12_P111642 | C45H4.17  | <i>cyp-33C2</i> | 2,186,492  | 5    | 134.26 | 5.34 |
| A_12_P104828 | C02A12.1  | <i>gst-33</i>   | 3,467,564  | 5    | 133.00 | 8.50 |
| A_12_P115936 | F08F3.7   | <i>cyp-14A5</i> | 5,421,110  | 5    | 133.78 | 8.56 |
| A_12_P108481 | T04H1.9   | <i>tbb-6</i>    | 12,263,208 | 5    | 134.26 | 6.42 |
| A_12_P111217 | C05C9.3   |                 | 11,143,372 | 6    | 133.00 | 4.95 |
| A_12_P105133 | C35C5.6   | <i>trpp-9</i>   | 11,569,206 | 6    | 133.78 | 8.13 |

■ **Table S1** Genes with expression linked to *col-182* in N2/CB4856 RIAILs (Rockman *et al.* 2010). Probe: Agilent microarray probe, ID: WormBase systematic identifier, Gene: common name (if any), Pos./Chr.: physical position of the transcript, QTL: genetic position of the quantitative trait locus in the RIAILs in cM (within 1 cM of *col-182*), LOD: logarithm of the odds of association between gene expression and the QTL peak.

## LITERATURE CITED

- Boeck, M. E., C. Huynh, L. Gevirtzman, O. A. Thompson, G. Wang, *et al.*, 2016 The time-resolved transcriptome of *C. elegans*. *Genome Research* **26**: 1441–1450.
- Rockman, M. V., S. S. Skrovanek, and L. Kruglyak, 2010 Selection at linked sites shapes heritable phenotypic variation in *C. elegans*. *Science* (New York, N.Y.) **330**: 372–376.
